# Supplementary material for: Probing Local Backbone Geometries in Intrinsically Disordered Proteins by Cross-Correlated NMR Relaxation
Source: PubMed Central journal article supplement (PMC3659411; doi:10.1002/anie.201210005), 2013-03-20
Supplement: anie0052-4604-SD1.pdf [file anie0052-4604-SD1.pdf]

Supporting Information

© Wiley-VCH 2013

69451 Weinheim, Germany

**Probing Local Backbone Geometries in Intrinsically Disordered Proteins by Cross-Correlated NMR Relaxation\*\***

*Jan Stanek, Saurabh Saxena, Leonhard Geist, Robert Konrat,\* and Wiktor Koźmiński\**

anie\_201210005\_sm\_miscellaneous\_information.pdf

## Supporting Information

### Appendix. Structural information embedded in C<sup>α</sup>(CSA)-NH(DD) cross-correlation rate

Carbonyl <sup>13</sup>C<sup>α</sup> chemical shift anisotropy – dipolar NH cross-correlation rate is given by

$$\Gamma_{H_{NN(i),C^{\alpha}(i)}} = \frac{4}{15} \frac{h}{2\pi} \frac{\gamma_H \gamma_C \omega_C}{r_{NH}^3} \tau_C \cdot f(\sigma_x, \sigma_y, \sigma_z) \quad [1]$$

where  $\tau_C$  is the (local) correlation time,  $\gamma_H$  and  $\gamma_C$  are gyromagnetic ratios of <sup>1</sup>H and <sup>13</sup>C, respectively,  $r_{NH}$  is the distance between amide <sup>1</sup>H and <sup>15</sup>N spins, and  $\omega_C$  is the Larmor frequency of <sup>13</sup>C spins.  $f(\sigma_x, \sigma_y, \sigma_z)$  is determined by magnitude (i. e. principal values) of <sup>13</sup>C<sup>α</sup> CSA tensor and orientation of NH vector in the frame of its principal axes. Thus, this term is also a function of dihedral angles  $\phi_i$  and  $\psi_i$ .

$$f = f(\sigma_x, \sigma_y, \sigma_z, \phi, \psi) \quad [2]$$

Therefore, a single C<sup>α</sup>(CSA)-NH(DD) CCR rate does not allow to unambiguously determine these dihedral angles. However, Kloiber and Konrat showed that rather small negative values are characteristic for residues in  $\alpha$ -helical regions while greater absolute values are typical for residues in loops <sup>[1]</sup>. Furthermore,  $\beta$ -turns of type I and II can be distinguished by inspection whether CCR value is nonnegative (type I) or of alternating sign (type II) for consecutive  $i+1$  and  $i+2$  residues in the  $\beta$ -turn.

For example, let us recall the selected CCR values measured for BASP1 at pH=2 and 6:

| Residue | pH 2    |           | pH 6    |           |
|---------|---------|-----------|---------|-----------|
|         | CCR, Hz | Error, Hz | CCR, Hz | Error, Hz |
| Thr76   | 0.30    | 0.63      | 1.25    | 0.24      |
| Val78   | -0.92   | 0.61      | 1.06    | 0.09      |
| Lys79   | -0.16   | 0.91      | 0.77    | 0.14      |
| Asn82   | 0.66    | 1.12      | 0.89    | 0.55      |
| Lys83   | -0.40   | 0.63      | 0.64    | 0.16      |
| Glu84   | -0.25   | 0.61      | -0.38   | 0.11      |
| Gln92   | 0.20    | 0.55      | 0.38    | 0.13      |
| Val93   | -0.96   | 0.46      | 0.10    | 0.07      |
| Ser94   | -0.89   | 0.63      | 0.20    | 0.19      |
| Ala95   | -0.22   | 0.62      | 0.67    | 0.22      |
| Asn96   | -0.31   | 0.81      | 2.01    | 0.30      |
| Lys97   | 0.50    | 0.52      | 0.64    | 0.19      |
| Thr98   | 0.10    | 0.50      | 0.45    | 0.11      |

It can be concluded that CCR values are systematically and, for some residues, noticeably smaller at lower pH. This indicates the shift of secondary structure populations towards  $\alpha$ -helices upon decrease of pH.

It should be emphasized that variations of local correlation time and anisotropic local motions in the protein backbone influence cross-correlation rates and complicates the quantitative analysis of the results. However, as we have already shown <sup>[2]</sup> the simultaneous fitting of several backbone-dependent cross-correlation rates lead to reliable distributions of dihedral backbone angles even in the presence of internal mobility. The here proposed multi-dimensional CCR experiment offers additional (independent) information about dihedral angle and further constraints the number of solutions. We thus propose to include this novel CCR experiment in the already described Z-surface approach for backbone dihedral angle determination.

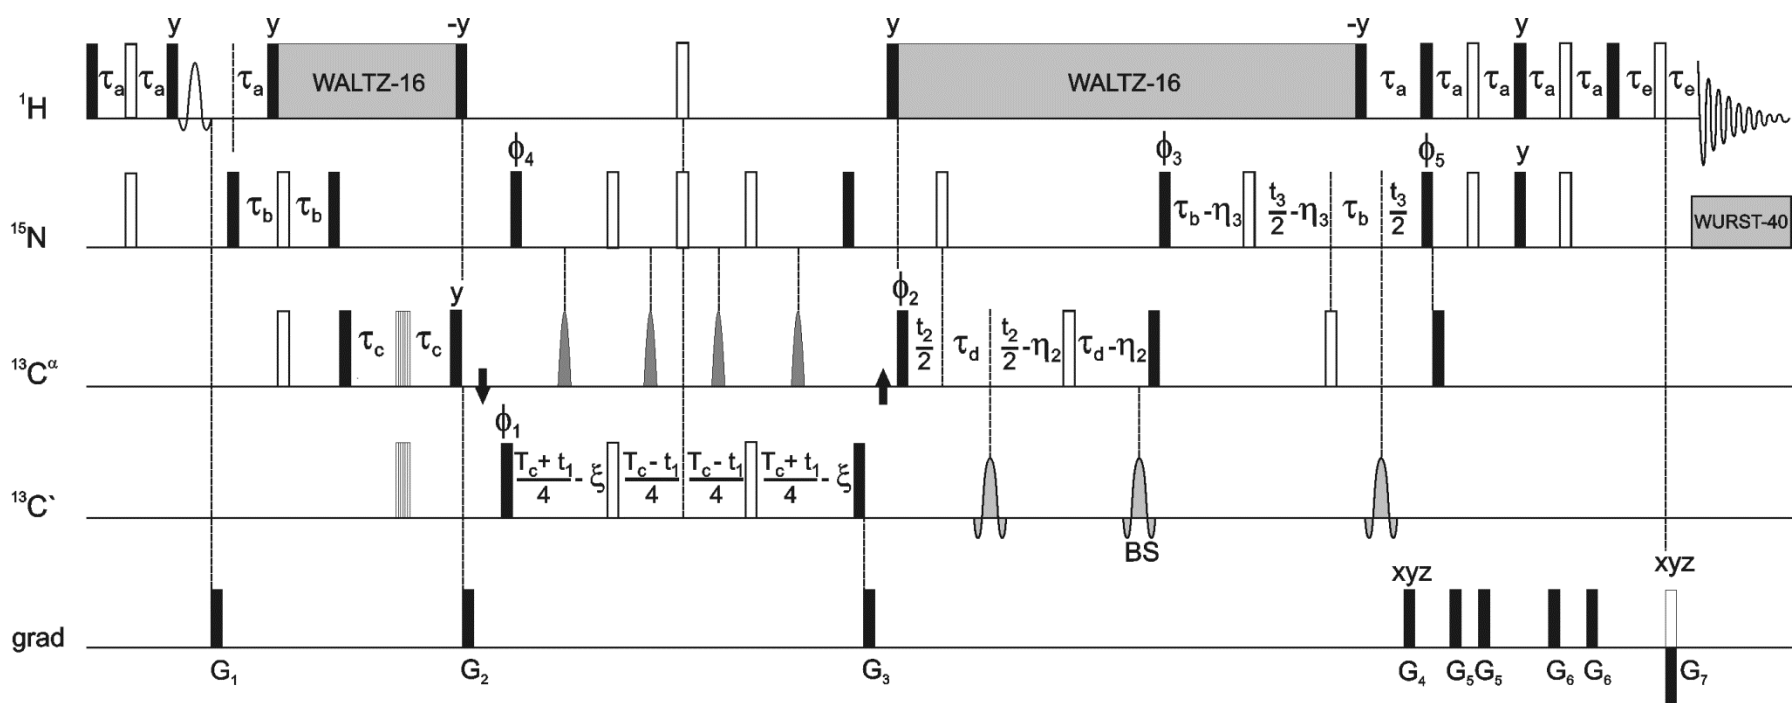

**Figure S1.** Pulse sequence for the 4D HNCACO-CCR experiment. Narrow and wide bars represent/indicate ‘hard’  $90^\circ$  and  $180^\circ$  pulses, respectively. All pulses are applied along the  $x$ -axis of the rotating frame unless indicated otherwise.  $^1\text{H}$  and  $^{15}\text{N}$  composite pulse decoupling is performed with WALTZ-16<sup>[3]</sup> and WURST-40<sup>[4]</sup>, respectively. Water-selective *sinc*-shaped  $\pi/2$ -pulse of duration of 1.22 ms is employed. Selective *sinc*-shaped  $\pi$  pulses, with  $\gamma B_1/2\pi = 12.0$  kHz and duration of 68.2  $\mu\text{s}$  (adjusted to obtain inversion of  $\text{C}'$  spin with no effect at  $\text{C}^\alpha$ ) are represented by wide grey *sinc*-shaped pulses. Gray bell-shaped pulses represent  $^{13}\text{C}^\alpha$ -selective Q3 pulses<sup>[5]</sup> of duration of 220  $\mu\text{s}$  and peak r.f. 14.5 kHz. Six-element composite pulse<sup>[6]</sup> is employed for simultaneous inversion of  $\text{C}^\alpha$  and  $\text{C}'$  spins. Other carbon  $90^\circ$  ( $180^\circ$ ) pulses are rectangular, with rf. field strength adjusted to  $|\Delta\Omega_{\text{CA-CO}}|/\sqrt{15}$  ( $\sqrt{3}$ ) and duration of 46.6  $\mu\text{s}$  (41.7  $\mu\text{s}$ ). Off-resonance pulses were applied using phase modulation of the carrier. ‘BS’ denotes Bloch-Siegert compensating pulse. The delays are  $\tau_a = 2.69$  ms,  $\tau_b = 14$  ms,  $\tau_c = 3.15$  ms,  $\tau_d = 4$  ms,  $\tau_e = 0.35$  ms. Constant-time duration  $T_C$  is 90 ms. The delay  $\xi = 2\text{pw}90(\text{C}')/\pi$  compensates  $\text{C}'$  evolution during  $\pi/2$  pulses flanking constant-time period.  $\text{C}^\alpha$  and  $^{15}\text{N}$  are evolved in the semi-constant time manner with contraction delays  $\eta_2 = \tau_d \cdot t_2 / t_{2,\text{max}}$  and  $\eta_3 = \tau_b \cdot t_3 / t_{3,\text{max}}$ . Water magnetization is stored along  $z$ -axis for detection to efficiently suppress solvent signal and avoid saturation of amide protons. Quadrature detection in  $t_1$  and  $t_2$  is accomplished by altering  $\phi_1$  and  $\phi_2$ , respectively, according to the States-TPPI procedure. Echo and anti-echo signals in  $t_3$  dimension were recorded in the interleaved fashion by inversion of gradient  $G_7$  and shift of  $\phi_5$  by  $\pi$  accordingly. The  $\phi_3$  and receiver phase are inverted for even numbered points in  $t_3$  to achieve axial peak displacement in  $\omega_3$ . The phase cycle employed is:  $\phi_1 = x, -x$ ;  $\phi_2 = x$ ;  $\phi_3 = x$ ;  $\phi_4 = 2(x)$ ,

2(-x);  $\phi_5 = x$ ;  $\phi_{\text{rec}} = x, -x, -x, x$ . The  $^1\text{H}$  carrier frequency is set on resonance with the water signal (4.77 ppm). The  $^{13}\text{C}$  carrier frequency, initially set to 58.6 ppm ( $^{13}\text{C}^\alpha$ ), is switched to 176.6 ppm ( $^{13}\text{C}'$ ) for the duration of CT block as indicated by vertical arrows. The  $^{15}\text{N}$  carrier is placed at 117.8 ppm. Gradients durations and strengths are:  $G_1$  (0.5 ms, 19.5 G/cm),  $G_2$  (1 ms, 14.2 G/cm),  $G_3$  (0.5 ms, 6.4 G/cm),  $G_4$  (2 ms, 31.9 G/cm),  $G_5$  (0.5 ms, 3.5 G/cm),  $G_6$  (0.5 ms, 5.3 G/cm),  $G_7$  (0.2 ms,  $-/+32.3$  G/cm).

Inter-scan delay of 1.2 s was used. 3350 (5000) sampling points ( $t_1, t_2, t_3$ ) were randomly chosen from  $180 \times 62 \times 125$  Cartesian grid according to Gaussian probability distribution  $p(t) = \exp[-(t/t_{\text{max}})^2/2\sigma^2]$ ;  $\sigma=0.5$ . The total experiment duration was 44 and 66 h for Chicken BASP1 samples at pH 2 and 6, respectively. Maximum evolution times of 90 ( $t_1$ ), 10 ( $t_2$ ) and 50 ms ( $t_3$ ) were achieved in the indirectly detected dimensions. Spectral widths of 2.0 ( $\omega_1$ ), 6.2 ( $\omega_2$ ), 2.5 ( $\omega_3$ ) and 12 kHz ( $\omega_4$ ) were assumed.

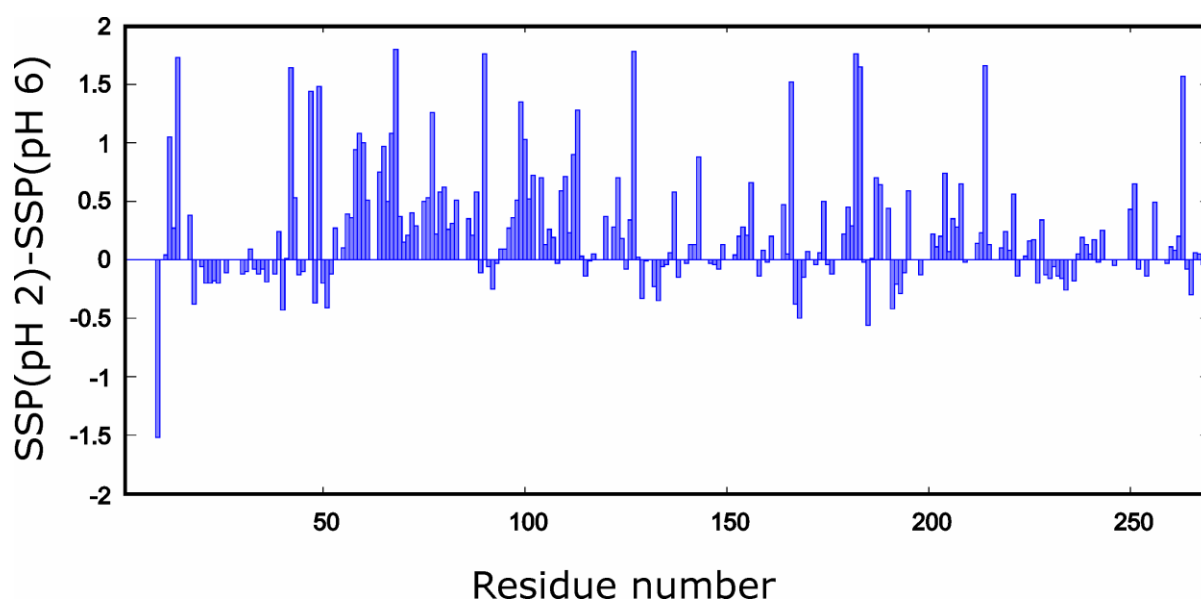

**Figure S2.** Change of secondary structure propensity (SSP) of BASP1 upon pH drop from 6 to 2 plotted for individual amino acid residues across full protein length. SSP for a particular pH was calculated as a difference of  $C^\alpha$  and  $C^\beta$  chemical shifts ( $\delta C^\alpha - \delta C^\beta$ ). Noteworthy is the significant change of SSP for residues 30-120 indicating increased preference for helical conformations at lower pH.

## References:

- [1] K. Kloiber, R. Konrat, *J. Am. Chem. Soc.* **2000**, *122*, 12033-12034.
- [2] K. Kloiber, W. Schüler, R. Konrat, *J. Biomol. NMR* **2002**, *22*, 349-363.
- [3] A. J. Shaka, J. Keeler, R. Freeman, *J. Magn. Reson.* **1983**, *53*, 313-340.
- [4] Ě. Kupče, R. Freeman, *J. Magn. Reson. Ser. A* **1995**, *115*, 273-276.
- [5] L. Emsley, G. Bodenhausen, *J. Magn. Reson.* **1992**, *97*, 135-148.
- [6] A. J. Shaka, *Chem Phys Lett* **1985**, *120*, 201-205.
